# Supplementary material
Source: publisher figshare collection journal article supplement (https://karger.figshare.com/articles/dataset/_/5697445)
Supplement: Supplementary file 1 [file 1]

Archive with 2 entries (2 files):
- SXD000536_SupplTable S1.docx
- SXD000536_Supplementary datax.pdf
