# Supplementary material
Source: publisher figshare collection journal article supplement (https://karger.figshare.com/articles/dataset/_/5697445)
Supplement: Supplementary file 1 [file 1 › SXD000536_Supplementary datax.pdf]

## Supplemental data

### Transcriptional activity of full-length AR and N/C interaction for p.Gln799Glu

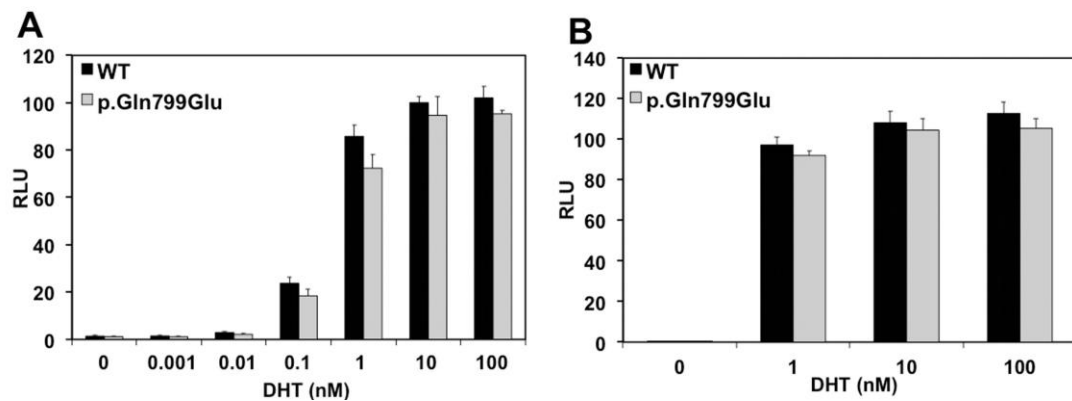

#### Experimental conditions:

In A, CHO cells were transfected with androgen-responsive firefly-luciferase p(ARE)<sub>2</sub>TATA-Luc, the *Renilla* luciferase plasmid phRGTK and full-length wt AR or AR\_p.Gln799Glu.

In B, CHO cells were transfected with pBD\_LBD\_wt or pBD\_LBD\_p.Gln799Glu, pAD\_NTD fusion constructs, pFR\_Luc and the phRGTK (*Renilla* luciferase).

Five hours after transfections, cells were treated with indicated concentration of DHT. Transfection efficiencies were normalized using the Dual Luciferase Assay kit. The activity of the wt or mutant constructs at 10 nM DHT was set to 100%. At least three independent experiments were performed in triplicates, error bars + 1 SD. RLU: relative luciferase units.

Individually, p.Gln799Glu retained 80-90% (t test,  $p=0.0356$ ) capacity of transactivating reporter gene expression in both full-length and N/C interaction experiments for DHT concentrations  $\geq 1.0$  nM.
