# Supplementary material
Source: publisher figshare collection journal article supplement (https://karger.figshare.com/articles/dataset/_/5697445)
Supplement: Supplementary file 1 [file SXD000536_SupplTable S1.docx]

## Supplementary Table S1: Mutagenesis primers used in this study.

| ***Primer*** | **Sequence 5’-3’** |
| --- | --- |
| AR_p.Ser760Thr_sense: | CTTCACCAATGTCAACACCAGGATGCTCTACTT |
| AR_p.Ser760Thr_antissense: | AAGTAGAGCATCCTGGTGTTGACATTGGTGAAG |
| AR_p.Leu769Val_sense: | CTACTTCGCCCCTGATGTGGTTTTCAATGAGTA |
| AR_p.Leu769Val_antissense: | TACTCATTGAAAACCACATCAGGGGCGAAGTAG |
| AR_p.Gln799Glu_sense: | GAGTTTGGATGGCTCGAAATCACCCCCCAGG |
| AR_p.Gln799Glu_antissense: | CCTGGGGGGTGATTTCGAGCCATCCAAACTC |
| AR_p.Cys807Phe_sense: | CCCAGGAATTCCTGTTCATGAAAGCACTGCT |
| AR_p.Cys807Phe_antissense: | TAGCAGTGCTTTCATGAACAGGAATTCCAGT |
| AR_p.Leu831Phe_sense: | TTCTTTGATGAATTTCGAATGAACTAC |
| AR_p.Leu831Phe_antissense: | GTAGTTCATTCGAAATTCATCAAAGAA |
| AR_p.Ile899Phe_sense: | GAAATGATGGCAGAGTTCATCTCTGTGCAAGT |
| AR_p.Ile899Phe_antissense: | ACTTGCACAGAGATGAACTCTGCCATCATTTC |
| AR_p.Pro905Arg_sense: | ATCTCTGTGCAAGTGCGCAAGATCCTTTCTG |
| AR_p.Pro905Arg_antissense: | CAGAAAGGATCTTGCGCACTTGCACAGAGAT |
